# Supplementary material
Source: Springer Nature journal article supplement (https://www.springermedizin.de/resource/supplementary/12968_2012_2619_MOESM2_ESM.pdf/9582328)

**A**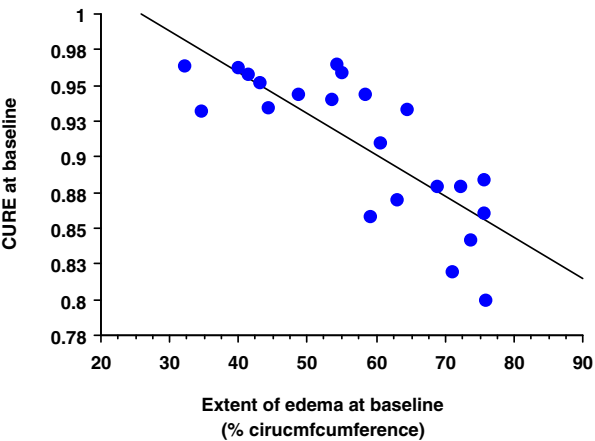**B**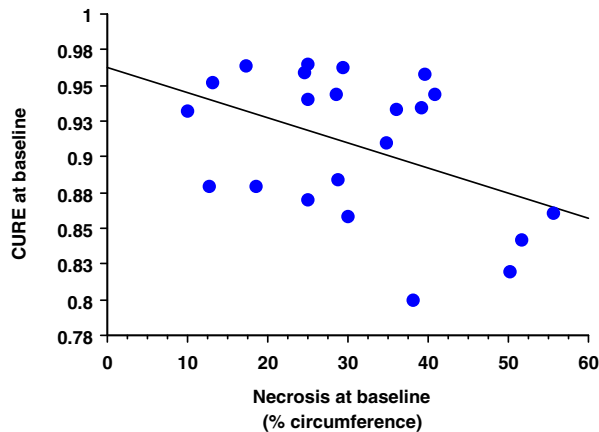**C**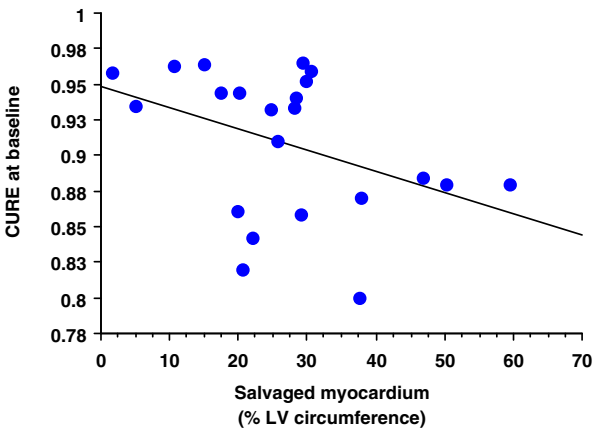**D**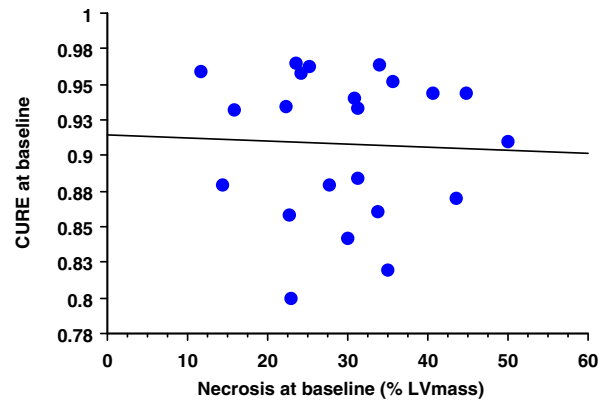**E**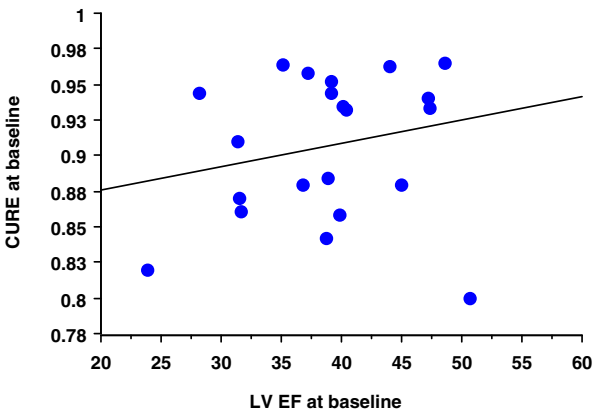

Supplement: MOESM2 [file 9582328]
